# Supplementary material for: Effects of Breathing Exercises in Patients With Chronic Obstructive Pulmonary Disease: Systematic Review and Meta-Analysis
Source: PubMed Central journal article supplement — Ann Rehabil Med. 2019 Aug 31;43(4):509–23. doi: 10.5535/arm.2019.43.4.509 (PMC6734022; doi:10.5535/arm.2019.43.4.509), 2019-08-31
Supplement: arm-2019-43-4-509-suppl1.pdf [file arm-2019-43-4-509-suppl1.pdf]

## SUPPLEMENTARY MATERIALS

**Table S1.** Summary of the effects of PLB compared to control group

| Outcome                        | No. of participants (studies) | Quality of evidence                 | Effect estimate (95% CI) |                     | p-value  |
|--------------------------------|-------------------------------|-------------------------------------|--------------------------|---------------------|----------|
|                                |                               |                                     | MD                       | SMD                 |          |
| <b>Ventilation</b>             |                               |                                     |                          |                     |          |
| RR (bpm)                       | 292 (6)                       | ⊕⊕⊕⊖ <sup>a</sup> Moderate          | -4.83 (-5.93, -3.72)     |                     | <0.0001* |
| SpO <sub>2</sub> (%)           | 252 (4)                       | ⊕⊕⊖ <sup>a</sup> ⊖ <sup>b</sup> Low | 1.19 (-0.22, 2.59)       |                     | 0.10     |
| V <sub>T</sub> (L)             | 108 (3)                       | ⊕⊕⊕⊖ <sup>a</sup> Moderate          |                          | 0.71 (0.31, 1.10)   | 0.0004*  |
| V <sub>e</sub> (L/min)         | 108 (3)                       | ⊕⊕⊕⊖ <sup>a</sup> Moderate          | 0.13 (-1.20, 1.46)       |                     | 0.85     |
| T <sub>i</sub> (s)             | 96 (2)                        | ⊕⊕⊕⊖ <sup>a</sup> Moderate          | 0.23 (0.06, 0.40)        |                     | 0.007*   |
| T <sub>tot</sub> (s)           | 96 (2)                        | ⊕⊕⊕⊖ <sup>a</sup> Moderate          | 1.02 (0.45, 1.58)        |                     | 0.0004*  |
| V <sub>T</sub> /T <sub>i</sub> | 96 (2)                        | ⊕⊕⊕⊖ <sup>a</sup> Moderate          |                          | 0.28 (-0.12, 0.69)  | 0.17     |
| IC                             | 130 (2)                       | ⊕⊕⊖ <sup>a</sup> ⊖ <sup>c</sup> Low |                          | 0.11 (-0.24, 0.45)  | 0.54     |
| <b>Sensation of dyspnea</b>    |                               |                                     |                          |                     |          |
| Dyspnea                        | 284 (4)                       | ⊕⊕⊖ <sup>a</sup> ⊖ <sup>b</sup> Low |                          | -1.13 (-2.67, 0.41) | 0.15     |
| <b>Exercise capacity</b>       |                               |                                     |                          |                     |          |
| 6MWD (m)                       | 78 (2)                        | ⊕⊕⊖ <sup>a</sup> ⊖ <sup>c</sup> Low | 3.13 (-28.61, 34.87)     |                     | 0.85     |

MD, mean difference; SMD, standard mean difference; PLB, pursed lip breathing; RR, respiratory rate; SpO<sub>2</sub>, oxygen saturation; V<sub>T</sub>, tidal volume; V<sub>e</sub>, minute ventilation; T<sub>i</sub>, inspiratory time; T<sub>tot</sub>, total respiratory time; V<sub>T</sub>/T<sub>i</sub>, mean inspiratory flow; IC, inspiratory capacity; 6MWD, 6-minute walk distance.

<sup>a</sup>Serious imprecision of measurements (sample size <400 participants).

<sup>b</sup>Serious inconsistency of results (I<sup>2</sup>≥50%).

<sup>c</sup>Serious risk of bias (>25% of participants from study with high risk of bias).

\*p<0.001.
