# Supplementary material for: Effects of Breathing Exercises in Patients With Chronic Obstructive Pulmonary Disease: Systematic Review and Meta-Analysis
Source: PubMed Central journal article supplement — Ann Rehabil Med. 2019 Aug 31;43(4):509–23. doi: 10.5535/arm.2019.43.4.509 (PMC6734022; doi:10.5535/arm.2019.43.4.509), 2019-08-31
Supplement: arm-2019-43-4-509-suppl3.pdf [file arm-2019-43-4-509-suppl3.pdf]

**Table S2.** Summary of the effects of VF plus exercise compared to control group

| Outcome                  | No. of participants (studies) | Quality of evidence        | Effect estimate (95% CI) |                    | p-value |
|--------------------------|-------------------------------|----------------------------|--------------------------|--------------------|---------|
|                          |                               |                            | MD                       | SMD                |         |
| Ventilation              |                               |                            |                          |                    |         |
| RR (bpm)                 | 58 (2)                        | ⊕⊕⊕⊖ <sup>a</sup> Moderate | -5.05 (-7.76, -2.35)     |                    | 0.0002* |
| SpO <sub>2</sub> (%)     | 65 (2)                        | ⊕⊕⊕⊖ <sup>a,b</sup> Low    | 0.55 (-0.99, 2.09)       |                    | 0.48    |
| V <sub>T</sub> (L)       | 58 (2)                        | ⊕⊕⊕⊖ <sup>a</sup> Moderate | 0.21 (-0.01, 0.43)       |                    | 0.06    |
| V <sub>e</sub> (L/min)   | 58 (2)                        | ⊕⊕⊕⊖ <sup>a,b</sup> Low    | -1.75 (-12.57, 9.06)     |                    | 0.75    |
| T <sub>i</sub> (s)       | 58 (2)                        | ⊕⊕⊕⊖ <sup>a</sup> Moderate | 0.07 (-0.02, 0.17)       |                    | 0.14    |
| T <sub>e</sub> (s)       | 58 (2)                        | ⊕⊕⊖⊖ <sup>a,b</sup> Low    | 0.27 (-0.05, 0.59)       |                    | 0.10    |
| IC (L)                   | 98 (3)                        | ⊕⊕⊖⊖ <sup>a,c</sup> Low    | 0.31 (0.13, 0.48)        |                    | 0.0007* |
| Sensation of dyspnea     |                               |                            |                          |                    |         |
| Dyspnea                  | 98 (3)                        | ⊕⊕⊖⊖ <sup>a,b</sup> Low    |                          | 0.08 (-0.63, 0.79) | 0.83    |
| Exercise capacity        |                               |                            |                          |                    |         |
| HR (bpm)                 | 58 (2)                        | ⊕⊕⊕⊖ <sup>a</sup> Moderate | -1.72 (-9.78, 6.34)      |                    | 0.68    |
| VO <sub>2</sub> (mL/min) | 58 (2)                        | ⊕⊕⊖⊖ <sup>a,b</sup> Low    | -15.77 (-273.84, 242.29) |                    | 0.90    |
| QoL                      |                               |                            |                          |                    |         |
| QoL-CRQ score            | 73 (2)                        | ⊕⊕⊖⊖ <sup>a,b</sup> Low    |                          | 0.01 (-0.67, 0.69) | 0.97    |

MD, mean difference; SMD, standard mean difference; VF, ventilatory feedback; RR, respiratory rate; SpO<sub>2</sub>, oxygen saturation; V<sub>T</sub>, tidal volume; V<sub>e</sub>, minute ventilation; T<sub>i</sub>, inspiratory time; T<sub>e</sub>, expiratory time; IC, inspiratory capacity; HR, heart rate; VO<sub>2</sub>, oxygen consumption; QoL, quality of life; CRQ, chronic respiratory questionnaires.

<sup>a</sup>Serious imprecision of measurements (sample size <400 participants).

<sup>b</sup>Serious inconsistency of results (I<sup>2</sup>≥50%).

<sup>c</sup>Serious risk of bias (>25% of participants from study with high risk of bias).

\*p<0.001.

**Table S3.** Summary of the effects of VF training compared to control group

| Outcome                  | No. of participants (studies) | Quality of evidence        | Effect estimate (95% CI)  |     | p-value |
|--------------------------|-------------------------------|----------------------------|---------------------------|-----|---------|
|                          |                               |                            | MD                        | SMD |         |
| Ventilation              |                               |                            |                           |     |         |
| RR (bpm)                 | 58 (2)                        | ⊕⊕⊕⊖ <sup>a</sup> Moderate | -2.00 (-5.84, -1.84)      |     | 0.31    |
| V <sub>T</sub> (L)       | 58 (2)                        | ⊕⊕⊕⊖ <sup>a</sup> Moderate | 0.14 (-0.09, 0.38)        |     | 0.23    |
| V <sub>e</sub> (L/min)   | 58 (2)                        | ⊕⊕⊕⊖ <sup>a</sup> Moderate | -3.22 (-10.60, 4.17)      |     | 0.39    |
| T <sub>i</sub> (s)       | 58 (2)                        | ⊕⊕⊕⊖ <sup>a</sup> Moderate | 0.06 (-0.05, 0.17)        |     | 0.28    |
| T <sub>e</sub> (s)       | 58 (2)                        | ⊕⊕⊕⊖ <sup>a</sup> Moderate | 0.20 (-0.05, 0.44)        |     | 0.12    |
| IC                       | 58 (2)                        | ⊕⊕⊕⊖ <sup>a</sup> Moderate | 0.09 (-0.30, 0.48)        |     | 0.65    |
| Sensation of dyspnea     |                               |                            |                           |     |         |
| Dyspnea                  | 58 (2)                        | ⊕⊕⊕⊖ <sup>a</sup> Moderate | 1.02 (-0.37, 2.41)        |     | 0.15    |
| Exercise capacity        |                               |                            |                           |     |         |
| HR (bpm)                 | 58 (2)                        | ⊕⊕⊕⊖ <sup>a</sup> Moderate | -5.50 (-12.65, 1.64)      |     | 0.13    |
| VO <sub>2</sub> (mL/min) | 58 (2)                        | ⊕⊕⊕⊖ <sup>a</sup> Moderate | -170.47 (-312.63, -28.31) |     | 0.02*   |

MD, mean difference; SMD, standard mean difference; VF, ventilatory feedback; RR, respiratory rate; V<sub>T</sub>, tidal volume; V<sub>e</sub>, minute ventilation; T<sub>i</sub>, inspiratory time; T<sub>e</sub>, expiratory time; HR, heart rate; VO<sub>2</sub>, oxygen consumption.

<sup>a</sup>Serious imprecision of measurements (sample size <400 participants).

<sup>b</sup>Serious inconsistency of results (I<sup>2</sup>≥50%).

<sup>c</sup>Serious risk of bias (>25% of participants from study with high risk of bias).

\*p<0.05.
