# Supplementary material for: Effects of Breathing Exercises in Patients With Chronic Obstructive Pulmonary Disease: Systematic Review and Meta-Analysis
Source: PubMed Central journal article supplement — Ann Rehabil Med. 2019 Aug 31;43(4):509–23. doi: 10.5535/arm.2019.43.4.509 (PMC6734022; doi:10.5535/arm.2019.43.4.509), 2019-08-31
Supplement: arm-2019-43-4-509-suppl4.pdf [file arm-2019-43-4-509-suppl4.pdf]

**Table S4.** Summary of the effects of singing compared to control group

| Outcome           | No. of participants (studies) | Quality of evidence        | Effect estimate (95% CI) |                     | p-value |
|-------------------|-------------------------------|----------------------------|--------------------------|---------------------|---------|
|                   |                               |                            | MD                       | SMD                 |         |
| Ventilation       |                               |                            |                          |                     |         |
| Breath hold (s)   | 52 (2)                        | ⊕⊕⊕⊖ <sup>a</sup> Moderate | -4.89 (-8.34, -1.44)     |                     | 0.005*  |
| Single breath     | 52 (2)                        | ⊕⊕⊕⊖ <sup>a</sup> Moderate | -2.93 (-6.35, 0.49)      |                     | 0.09    |
| Exercise capacity |                               |                            |                          |                     |         |
| ISWT (m)          | 52 (2)                        | ⊕⊕⊕⊖ <sup>a</sup> Moderate | -11.07 (-39.38, 17.24)   |                     | 0.44    |
| QoL               |                               |                            |                          |                     |         |
| SF-36 PCS         | 52 (2)                        | ⊕⊕⊕⊖ <sup>a</sup> Moderate | 12.64 (5.50, 19.77)      |                     | 0.0005* |
| SF-36 MCS         | 52 (2)                        | ⊕⊕⊕⊖ <sup>a</sup> Moderate | 5.42 (-3.90, 14.74)      |                     | 0.25    |
| HAD-anxiety       | 52 (2)                        | ⊕⊕⊕⊖ <sup>a</sup> Moderate | -1.25 (-2.61, 0.10)      |                     | 0.07    |
| HAD-sepression    | 52 (2)                        | ⊕⊕⊕⊖ <sup>a</sup> Moderate | -0.87 (-2.16, 0.42)      |                     | 0.19    |
| QoL               | 82 (3)                        | ⊕⊕⊕⊖ <sup>a</sup> Moderate |                          | -0.14 (-0.58, 0.29) | 0.52    |

MD, mean difference; SMD, standard mean difference; ISWT, incremental shuttle walk test; SF-36, Short Form 36 Questionnaire; PCS, physical component summary; MCS, mental component summary; HAD, Hospital Anxiety and Depression score; QoL, quality of life.

<sup>a</sup>Serious imprecision of measurements (sample size <400 participants).

<sup>b</sup>Serious inconsistency of results ( $I^2 \geq 50\%$ ).

<sup>c</sup>Serious risk of bias (>25% of participants from study with high risk of bias).

\*p<0.001.

**Table S5.** Summary of the effects of combined BEs compared to control group

| Outcome                  | No. of participants (studies) | Quality of evidence        | Effect estimate (95% CI) |                    | p-value   |
|--------------------------|-------------------------------|----------------------------|--------------------------|--------------------|-----------|
|                          |                               |                            | MD                       | SMD                |           |
| Ventilation              |                               |                            |                          |                    |           |
| RR                       | 111 (2)                       | ⊕⊕⊕⊖ <sup>a</sup> Moderate | -5.53 (-6.98, -4.09)     |                    | <0.00001* |
| SpO <sub>2</sub>         | 91 (2)                        | ⊕⊕⊕⊖ <sup>a</sup> Moderate |                          | 0.04 (-0.37, 0.46) | 0.84      |
| Exercise capacity        |                               |                            |                          |                    |           |
| VO <sub>2</sub> (mL/min) | 111 (2)                       | ⊕⊕⊕⊖ <sup>a</sup> Moderate | -7.31 (-18.39, 3.78)     |                    | 0.20      |

MD, mean difference; SMD, standard mean difference; RR, respiratory rate; SpO<sub>2</sub>, oxygen saturation; VO<sub>2</sub>, oxygen consumption.

<sup>a</sup>Serious imprecision of measurements (sample size <400 participants).

<sup>b</sup>Serious inconsistency of results ( $I^2 \geq 50\%$ ).

<sup>c</sup>Serious risk of bias (>25% of participants from study with high risk of bias).

\*p<0.001.
