# Supplementary material for: Effects of Breathing Exercises in Patients With Chronic Obstructive Pulmonary Disease: Systematic Review and Meta-Analysis
Source: PubMed Central journal article supplement — Ann Rehabil Med. 2019 Aug 31;43(4):509–23. doi: 10.5535/arm.2019.43.4.509 (PMC6734022; doi:10.5535/arm.2019.43.4.509), 2019-08-31
Supplement: arm-2019-43-4-509-suppl6.pdf [file arm-2019-43-4-509-suppl6.pdf]

**Table S6.** Summary of the effects of DBE compared to control group

| Outcome              | No. of participants (studies) | Quality of evidence                 | Effect estimate (95% CI) |                      | p-value |
|----------------------|-------------------------------|-------------------------------------|--------------------------|----------------------|---------|
|                      |                               |                                     | MD                       | SMD                  |         |
| Ventilation          |                               |                                     |                          |                      |         |
| RR                   | 155 (2)                       | ⊕⊕⊖ <sup>a</sup> ⊖ <sup>b</sup> Low |                          | -1.09 (-2.19, -0.00) | 0.05    |
| Sensation of dyspnea |                               |                                     |                          |                      |         |
| Dyspnea              | 121 (2)                       | ⊕⊕⊖ <sup>a</sup> ⊖ <sup>b</sup> Low |                          | 0.21 (-0.37, 0.79)   | 0.47    |
| QoL                  |                               |                                     |                          |                      |         |
| SGRO score           | 123 (2)                       | ⊕⊕⊖ <sup>a</sup> ⊖ <sup>b</sup> Low |                          | 0.20 (-0.51, 0.91)   | 0.058   |

MD, mean difference; SMD, standard mean difference; DBE, diaphragmatic breathing; RR, respiratory rate; SGRQ, St. George's Respiratory Questionnaire.

<sup>a</sup>Serious imprecision of measurements (sample size <400 participants).

<sup>b</sup>Serious inconsistency of results ( $I^2 \geq 50\%$ ).

<sup>c</sup>Serious risk of bias (>25% of participants from study with high risk of bias).
